# Supplementary material
Source: PubMed Central journal article supplement (PMC3319975)
Supplement: NIHMS366359-supplement-Supp_data.pdf [file NIHMS366359-supplement-Supp_data.pdf]

## Supplementary Materials for

### **Prostaglandin D<sub>2</sub> Inhibits Hair Growth and Is Elevated in Bald Scalp of Men with Androgenetic Alopecia**

Luis A. Garza, Yaping Liu, Zaixin Yang, Brinda Alagesan, John A. Lawson, Scott M. Norberg, Dorothy E. Loy, Tailun Zhao, Hanz B. Blatt, David C. Stanton, Lee Carrasco, Gurpreet Ahluwalia, Susan M. Fischer, Garret A. FitzGerald, George Cotsarelis\*

\*To whom correspondence should be addressed. E-mail: cotsarel@mail.med.upenn.edu

Published 21 March 2012, *Sci. Transl. Med.* **4**, 126ra34 (2012)  
DOI: 10.1126/scitranslmed.3003122

#### **The PDF file includes:**

Fig. S1. Verification of hair cycle stage in wild-type mice.

Fig. S2. 15-Deoxy- $\Delta^{12,14}$ -prostaglandin J<sub>2</sub> (15-dPGJ<sub>2</sub>) induces apoptosis in cultured human keratinocytes.

Fig. S3. Analogs of PGD<sub>2</sub> inhibit hair lengthening according to their relative agonism of GPR44.

## SUPPLEMENTARY FIGURES

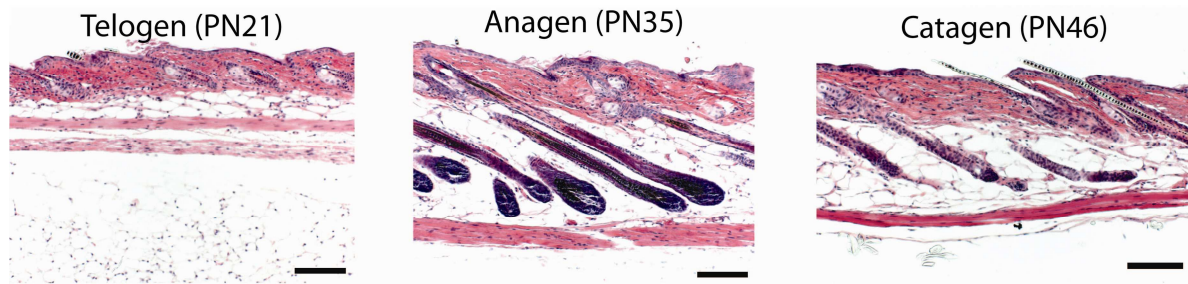

**Figure S1.** Verification of hair cycle stage in wild-type mice. (A to C) Representative skin biopsies from mice showing histology characteristic of telogen at PN21 (A), late anagen at PN35 (B), and early catagen at PN46 (C). Scale bars, 100  $\mu$ m.

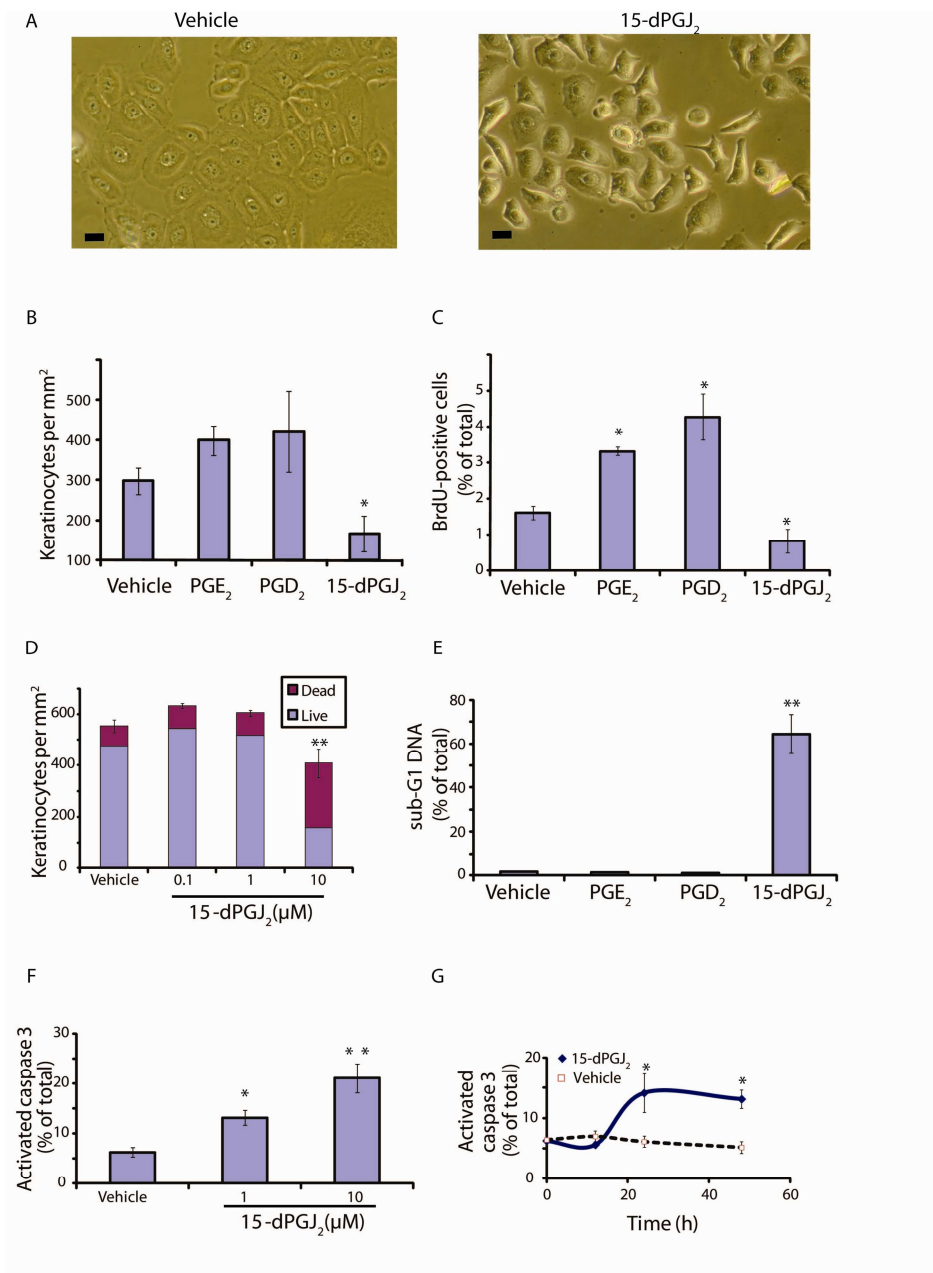

**Figure S2.** 15-Deoxy- $\Delta$ 12,14-prostaglandin J<sub>2</sub> (15-dPGJ<sub>2</sub>) induces apoptosis in cultured human keratinocytes. **(A)** Phase contrast microscopy of cultured human foreskin keratinocytes treated with either acetone vehicle or 10  $\mu$ M 15-dPGJ<sub>2</sub>. Scale bars, 10  $\mu$ m. **(B)** Total number of keratinocytes recovered after treatment with vehicle, PGE<sub>2</sub>, PGD<sub>2</sub>, or 15-dPGJ<sub>2</sub>. Data are means  $\pm$  SEM ( $n = 4$  per treatment group). **(C)** Percent of cells with incorporated BrdU after treatment with vehicle, PGE<sub>2</sub>, PGD<sub>2</sub>, or 15-dPGJ<sub>2</sub>. Data are means  $\pm$  SEM ( $n = 4$ ). **(D)** Total numbers of live and dead keratinocytes after treatment with vehicle or varying concentrations of 15-dPGJ<sub>2</sub>. Data are means  $\pm$  SEM ( $n = 4$  per treatment group). **(E)** Percentage of keratinocytes with sub-G1 quantities of DNA after treatment with vehicle, PGE<sub>2</sub>, PGD<sub>2</sub>, or 15-dPGJ<sub>2</sub>. Data are means  $\pm$

SEM ( $n = 4$  per treatment group). (F) Percentage of keratinocytes with activated caspase after 48 h of treatment with vehicle or 15-dPGJ<sub>2</sub>. Data are means  $\pm$  SEM ( $n = 3$  per treatment group). (G) Percentage of keratinocytes with activated caspase 3 after 10  $\mu$ M 15-dPGJ<sub>2</sub> exposure for the indicated time of treatment. Data are means  $\pm$  SEM ( $n = 3$ ). \* $P < 0.05$ , \*\* $P < 0.01$ , compared to vehicle, Student's  $t$  test.

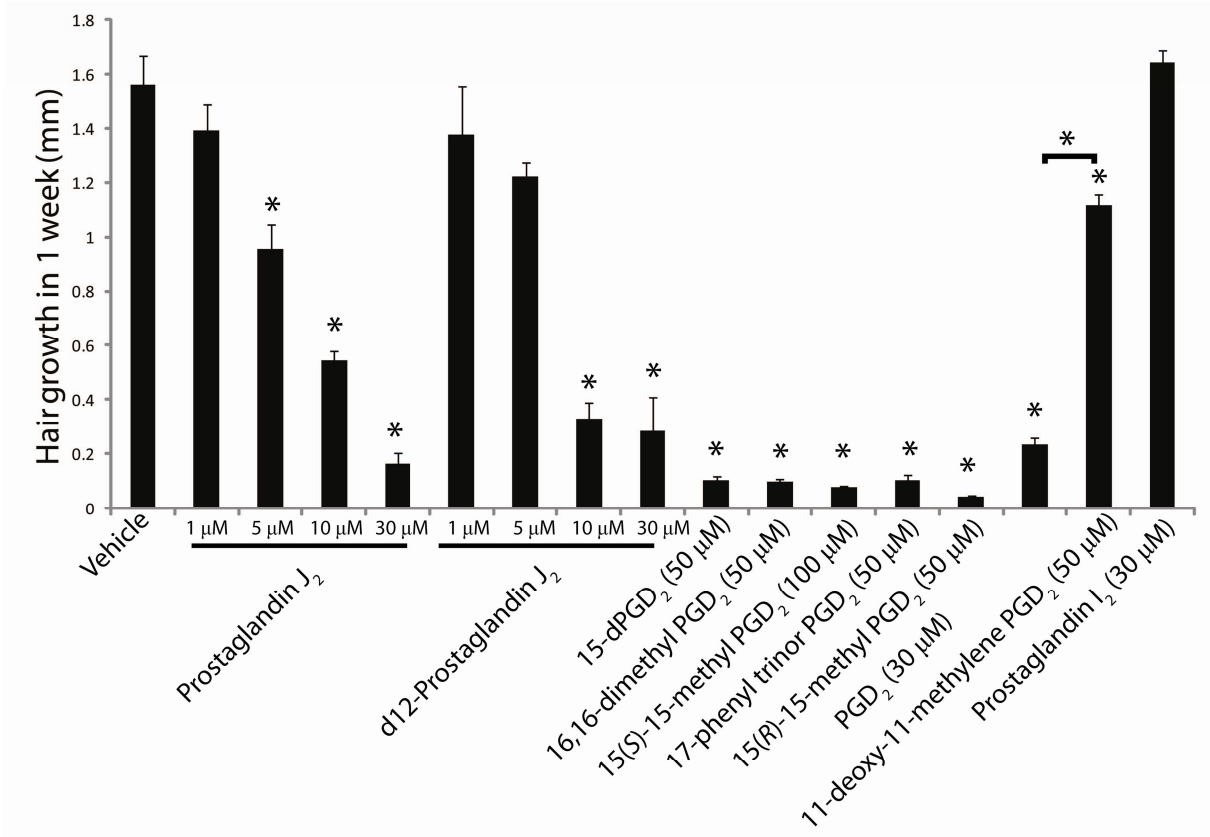

**Figure S3.** Analogs of PGD<sub>2</sub> inhibit human hair lengthening according to their relative agonism of GPR44. In vitro growth of explanted human hair follicles over the course of 7 days in culture with listed PGD<sub>2</sub> analogues, prostaglandin I<sub>2</sub>, or vehicle control ( $n = 3$  per treatment group). \* $P < 0.05$  compared to vehicle, unless otherwise noted, Student's  $t$  test.
